1           **Molecular architecture of nucleosome remodeling and**  
2           **deacetylase sub-complexes by integrative structure**  
3           **determination**

4  
5  
6  
7  
8       Shreyas Arvindkar<sup>1</sup>, Matthew J. Jackman<sup>2</sup>, Jason K.K. Low<sup>3</sup>, Michael J. Landsberg<sup>2, \*</sup>, Joel  
9       P. Mackay<sup>3, \*</sup>, and Shruthi Viswanath<sup>1, \*</sup>

10  
11       <sup>1</sup>National Center for Biological Sciences, Tata Institute of Fundamental Research, Bangalore,  
12       India

13       <sup>2</sup>School of Chemistry and Molecular Biosciences, University of Queensland, QLD, Australia

14       <sup>3</sup>School of Life and Environmental Sciences, University of Sydney, NSW, Australia

15  
16       \*Corresponding authors E-mail: m.landsberg@uq.edu.au (M.J.L.);  
17       joel.mackay@sydney.edu.au (J.P.M.); shruthiv@ncbs.res.in (S.V.)

18  
19  
20  
21  
22  
23       Short title: Integrative models of NuRD sub-complexes  
24  
25  
26  
27

## 28 Abstract

29 The Nucleosome Remodeling and Deacetylase (NuRD) complex is a chromatin-modifying  
30 assembly that regulates gene expression and DNA damage repair. Despite its importance,  
31 limited structural information is available on the complex and a detailed understanding of its  
32 mechanism is lacking. We investigated the molecular architecture of three NuRD sub-  
33 complexes: MTA1-HDAC1-RBBP4 (MHR), MTA1<sup>N</sup>-HDAC1-MBD3<sup>GATAD2CC</sup> (MHM), and MTA1-  
34 HDAC1-RBBP4-MBD3-GATAD2 (NuDe) using Bayesian integrative structure determination  
35 with IMP (Integrative Modeling Platform), drawing on information from SEC-MALLS, DIA-MS,  
36 XLMS, negative-stain EM, X-ray crystallography, NMR spectroscopy, secondary structure and  
37 homology predictions. The structures were corroborated by independent cryo-EM maps,  
38 biochemical assays, and known cancer-associated mutations. MBD3 is a demethylase that  
39 connects the deacetylase and chromatin-remodeling modules in NuRD. Localization of the full-  
40 length MBD3 in NuRD was not previously characterized. Our models indicate two different  
41 localizations for MBD3 in NuRD, suggesting a mechanism by which MBD3 in the presence of  
42 GATAD2 asymmetrically bridges the two modules in NuRD. Further, our models indicate three  
43 previously unrecognized subunit interfaces in NuDe: HDAC1<sup>C</sup>-MTA1<sup>BAH</sup>, MTA1<sup>BAH</sup>-MBD3, and  
44 HDAC1<sup>60-100</sup>-MBD3. We observed that a significant number of cancer-associated mutations  
45 mapped to protein-protein interfaces in NuDe. Our approach also allows us to localize regions  
46 of unknown structure, such as HDAC1<sup>C</sup> and MBD3<sup>DR</sup>, thereby resulting in the most complete  
47 structural characterization of these NuRD sub-complexes so far.  
48

## 49 Introduction

50 The Nucleosome Remodeling and Deacetylase (NuRD) complex is a multi-protein chromatin-  
51 modifying assembly, expressed in most metazoan tissues, and conserved across multi-cellular  
52 animals (Basta and Rauchman, 2017; Denslow and Wade, 2007; Lejon et al., 2011; Yoshida  
53 et al., 2008). It regulates gene expression and DNA damage repair and it modulates  
54 nucleosome accessibility in enhancers and promoters for transcription factors and RNA  
55 polymerases, thereby regulating the expression of target genes (Basta and Rauchman, 2017,  
56 2015; Bornelöv et al., 2018; Burgold et al., 2019; Denslow and Wade, 2007; Li and Kumar,  
57 2010; Reynolds et al., 2013; Smeenk et al., 2010; Yoshida et al., 2008). Subunits of NuRD are  
58 implicated in human cancers and various congenital defects (Basta and Rauchman, 2015; Toh  
59 and Nicolson, 2009). Considerable diversity is observed in subunit isoforms and NuRD-  
60 associated factors across tissues (Burgold et al., 2019; Denslow and Wade, 2007; Hoffmann  
61 and Spengler, 2019).

62 NuRD comprises two catalytic modules – a histone deacetylase module and ATP-dependent  
63 chromatin-remodeling module (Burgold et al., 2019; Denslow and Wade, 2007; Low et al.,  
64 2020). The deacetylase module contains metastasis-associated proteins (MTA1/2/3) that form  
65 a dimeric scaffold for the histone deacetylases (HDAC1/2). It also contains the chaperones  
66 RBBP4/7, which mediate interactions of NuRD with histone tails and transcription factors (Basta  
67 and Rauchman, 2017, 2015; Hong et al., 2005). The chromatin-remodeling module contains  
68 methyl-CpG DNA-binding proteins (MBD2/3) that recruit NuRD to methylated and/or hemi-  
69 methylated DNA, GATA-type zinc-finger proteins (GATAD2A/B), and an ATP-dependent DNA  
70 translocase (CHD3/4/5) (Burgold et al., 2019; Low et al., 2020).

71  
72 Some structural information is available for the complex. Several attempts made to determine  
73 the stoichiometry of the endogenous NuRD complex have returned variable results (Bode et  
74 al., 2016; Guo et al., 2019; Kloet et al., 2015; Sharifi Tabar et al., 2019; Smits et al., 2013;  
75 Spruijt et al., 2016; Zhang et al., 2016). A recent characterization by quantitative mass

76 spectrometry from (Low et al., 2020) reported a 2:2:4:1:1:1  
77 (MTA1:HDAC1:RBBP4:MBD3:GATAD2A:CHD4) stoichiometry for the full NuRD complex.  
78 Atomic structures of parts of the NuRD complex, including the MTA1-HDAC1 dimer, RBBP4  
79 bound to MTA1, the MBD domain of MBD3, and the coiled-coil dimer of MBD2 and GATAD2A  
80 have been determined by X-ray crystallography and NMR spectroscopy (Alqarni et al., 2014;  
81 Cramer et al., 2014; Gnanapragasam et al., 2011; Millard et al., 2016, 2013). Structures of the  
82 2:2 MTA1-HDAC1 dimer, the 2:2:4 MTA1-HDAC1-RBBP4 complex (MHR), the 2:2:2 MTA1<sup>N</sup>-  
83 HDAC1-MBD3<sup>GATAD2CC</sup> (MHM) complex, the 2:2:4:1:1 MTA1-HDAC1-RBBP4-MBD3-GATAD2  
84 (NuDe complex), and CHD4 bound to a nucleosome substrate have also been characterized  
85 at various resolutions by negative stain and/or cryo-electron microscopy (Farnung et al., 2020;  
86 Low et al., 2020; Millard et al., 2020, 2016).

87  
88 Pairwise interactions between domains and subunits within the MHR, MHM, NuDe, and the  
89 endogenous NuRD complexes have also been characterized by chemical crosslinking and  
90 mass spectrometry (XLMS) (Low et al., 2020; Millard et al., 2016). A model of the MHM  
91 complex, based on crosslinks-driven rigid-body docking of known atomic structures with a pair  
92 of MTA1-RBBP4 structures manually placed, has also been reported (Low et al., 2020). While  
93 this represents the most complete model of NuRD architecture, it only accounts for 30% of  
94 residues in the NuRD complex. In fact, only 50% of residues in NuRD have known or readily  
95 modeled atomic structures, and the structures of proteins such as MBD3, CHD4, and GATAD2  
96 are largely uncharacterized. More recent artificial intelligence-based methods such as  
97 AlphaFold are also unable to resolve these uncharacterized regions (Jumper et al., 2021).  
98 Owing to variability in the paralogue composition as well as significant structural dynamics, the  
99 atomic structure of the entire NuRD complex is still undetermined and is likely to remain a  
100 challenge for some time to come.

101

102 The 2:2:4 MTA1-HDAC1-RBBP4 complex (MHR) forms the deacetylase core of NuRD. MBD3  
103 binds to the N-terminal half of MTA1 to form a 2:2:2 MTA1<sup>N</sup>-HDAC1-MBD3<sup>GATAD2CC</sup> (MHM)  
104 complex, which contains two copies of MBD3 (Low et al., 2020). However, the 2:2:4:1:1 MTA1-  
105 HDAC1-RBBP4-MBD3-GATAD2 (NuDe complex) and the endogenous NuRD complex are  
106 asymmetric, both containing a single copy of MBD3 (Low et al., 2020). The mechanism by  
107 which this asymmetry is introduced in NuDe/NuRD is not known. The structure of full-length  
108 MBD3 is unknown and it contains a significant intrinsically disordered region (IDR; MBD3<sup>71-213</sup>),  
109 which has been shown to be critical for recruiting the deacetylase core in case of MBD2 (Desai  
110 et al., 2015). The localization of full-length MBD3 in NuDe/NuRD is also not known.

111 Here, we investigated the molecular architecture of the MHR, MHM, and NuDe complexes  
112 using an integrative approach. Integrative structure determination is a method for investigating  
113 structures of large assemblies which are refractory to a single experimental method such as X-  
114 ray crystallography or cryo-electron microscopy (Alber et al., 2007; Ganesan et al., 2020;  
115 Gutierrez et al., 2020; Kim et al., 2018; Rout and Sali, 2019; Russel et al., 2012; Viswanath et  
116 al., 2017a; Ward et al., 2013). Using Bayesian integrative modeling with the Integrative  
117 Modeling Platform (IMP), we combined data from complementary experiments, physical  
118 principles, statistical inference, and prior models. This approach allowed us to combine noisy,  
119 sparse, ambiguous, and incoherent data at various resolutions (Alber et al., 2007; Rieping et  
120 al., 2005; Rout and Sali, 2019; Schneidman-Duhovny et al., 2014). It produced an ensemble of

121 models consistent with the input information, allowing us to obtain precise uncertainty bounds  
122 on the structure (Saltzberg et al., 2019, 2021; Viswanath et al., 2017b; Webb et al., 2018). We  
123 used data from SEC-MALLS, DIA-MS, XLMS, negative stain EM, X-ray crystallography, NMR  
124 spectroscopy, secondary structure and homology predictions, and stereochemistry  
125 considerations (Alqarni et al., 2014; Connelly et al., 2006; Cramer et al., 2014; Gnanapragasam  
126 et al., 2011; Low et al., 2020; Millard et al., 2016, 2013). These integrative structures were  
127 corroborated by independent cryo-EM maps, biochemical assays, and known cancer-  
128 associated mutations, a significant number of which mapped to protein-protein interfaces in the  
129 structures (Desai et al., 2015; Forbes et al., 2006; Millard et al., 2020; Pflum et al., 2001; Zhang  
130 et al., 1999). By using all available information, the accuracy, precision, completeness, and  
131 efficiency of structure determination were maximized (Alber et al., 2007; Rout and Sali, 2019;  
132 Russel et al., 2012).

133 The integrative approach allows for regions of unknown structure to be modeled in the context  
134 of regions of known structure. This facilitated the modeling of NuRD proteins with significant  
135 regions of unknown structure, such as MBD3, at full-length, for the first time. Our models  
136 indicate that MBD3 localizes in two different sites in NuRD. This suggests a mechanism by  
137 which MBD3, in the presence of GATAD2, asymmetrically bridges the deacetylase and  
138 chromatin-remodeling modules. Finally, our models enable us to compare the structure of the  
139 MHR complex in the presence and absence of MBD3 and GATAD2. We show that, while the  
140 MHR complex alone is dynamic, the presence of MBD3 and GATAD2 makes it less dynamic.

141

## 142 **Results**

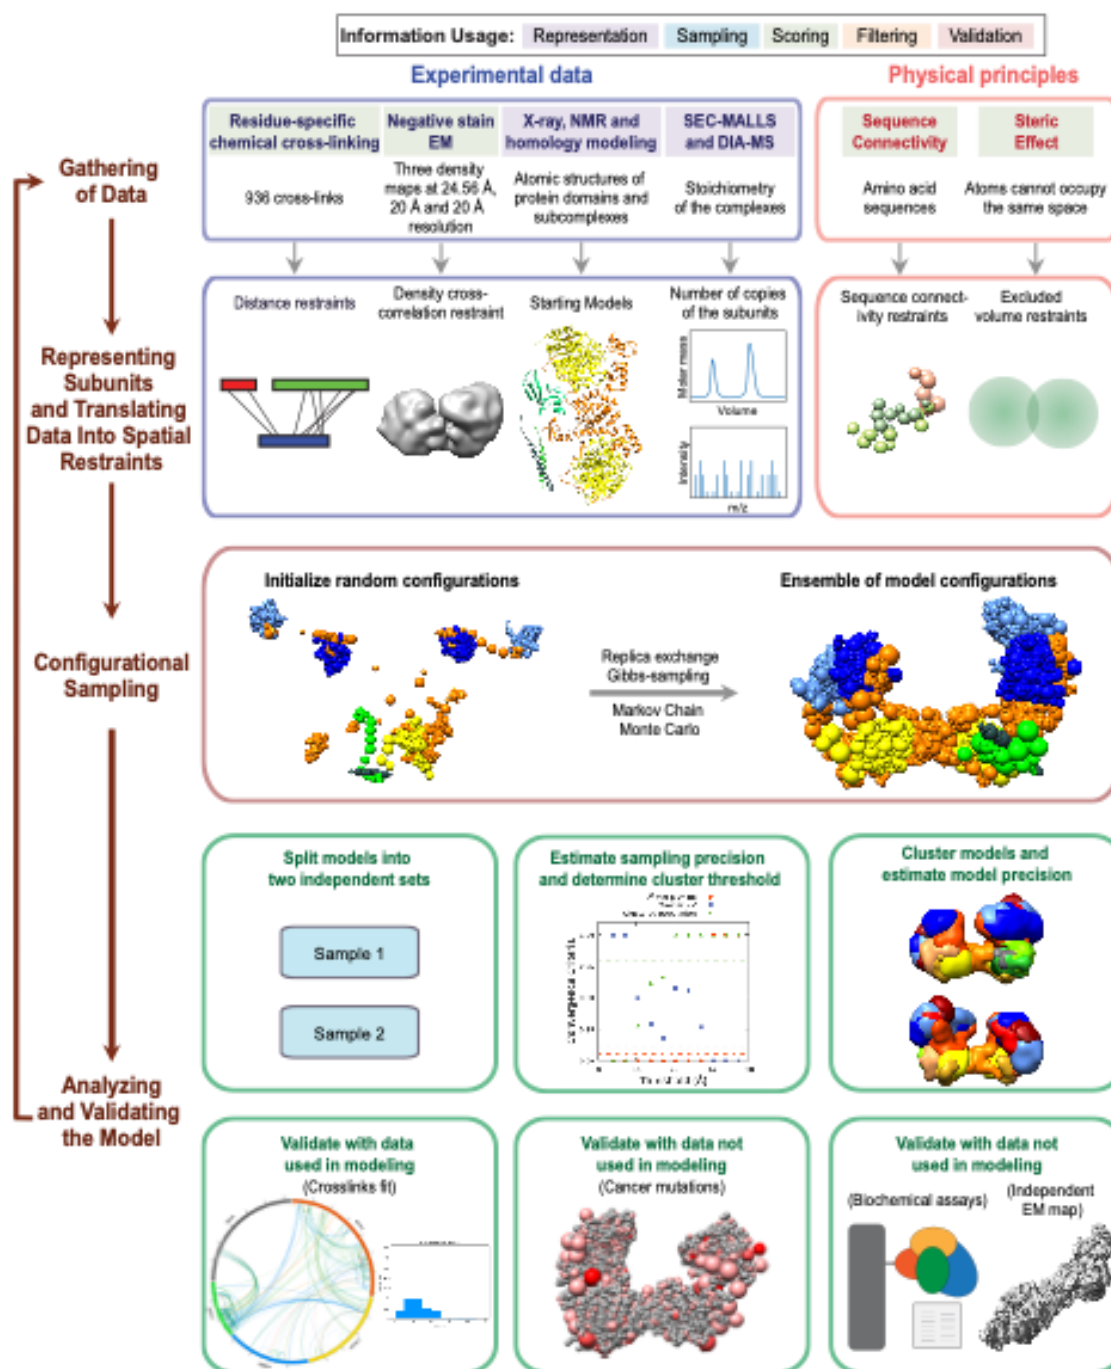

143  
144  
145  
146  
147  
148  
149

**Fig. 1 Integrative structure determination of NuRD sub-complexes** Schematic describing the workflow for integrative structure determination of NuRD sub-complexes. The first row describes the input information. The second-row details how data is used to encode spatial restraints. The third row mentions the sampling method, and the last two rows illustrate the analysis and validation protocol. The background colors of the input information show the stage of modeling in which the information is used, as shown in the legend at the top.

150  
151  
152  
153  
154  
155

## Integrative modeling workflow

The integrative modeling of the MHR, MHM, and NuDe complexes proceeded in four stages (Fig. 1, Material and Methods) (Alber et al., 2007; Rout and Sali, 2019; Russel et al., 2012). The modeled NuRD proteins (subunits), their domains, their representations, and the number of copies in the modeled complexes are shown (Fig. S1A-S1C). The stoichiometry of the modeled proteins was informed by DIA-MS and SEC-MALLS experiments (Fig. S1C) (Low et



156 al., 2020). Regarding paralogs, a single representative for each protein was chosen for this  
157 work for simplicity, namely MTA1, HDAC1, RBBP4, MBD3 and GATAD2A (Fig. S1A).

158  
159 We first represented each protein as a series of beads of sizes that depend on the degree of  
160 knowledge of the structure (and can vary throughout the sequence). Protein domains with  
161 known atomic structures (such as the MTA1-HDAC1 dimer) were represented at 1 and 10  
162 residues per bead and modeled as rigid bodies, whereas domains without known structure  
163 (such as the MBD3<sup>IDR</sup>) were coarse-grained at 30 residues per bead and modeled as flexible  
164 strings of beads (Fig. S1A-S1B). Data from chemical crosslinking combined with mass  
165 spectrometry (XL-MS) were used to restrain the distance between cross-linked residues.  
166 Negative-stain EM maps were used to restrain the shape of the complexes (Low et al., 2020).

167  
168 The simulations started with randomized configurations for the rigid bodies and flexible beads.  
169 Over 40 million models per complex were sampled using a Monte Carlo approach (Replica  
170 Exchange Gibbs Sampling MCMC; Materials and Methods). The models were scored based  
171 on agreement with XL-MS and EM data, together with additional stereochemistry restraints  
172 such as connectivity and excluded volume. For each complex, about 20,000 models that  
173 sufficiently satisfied the input information were selected for further analysis (Saltzberg et al.,  
174 2021).

175  
176 These models were clustered based on structural similarity and the precision of the clusters  
177 was estimated (Fig. S3-S5) (Saltzberg et al., 2019, 2021; Viswanath et al., 2017b). The quality  
178 of the models was assessed by fit to input data (Fig. S6-S8), as well as data not used in  
179 modeling, such as independent cryo-EM maps (Millard et al., 2020), published biochemical data  
180 (Desai et al., 2015; Millard et al., 2020; Pflum et al., 2001; Zhang et al., 1999) and human  
181 cancer-associated mutations (COSMIC) (Table S1) (Forbes et al., 2006). The resulting  
182 integrative models were visualized in two ways - a representative bead model and a localization  
183 probability density map, and represented in UCSF Chimera and ChimeraX (Pettersen et al.,  
184 2021, 2004). The bead model represents the centroid of the major cluster, whereas the  
185 localization probability density map represents all models in the major cluster, by specifying the  
186 probability of a voxel (3D volume unit) being occupied by a bead in the set of superposed cluster  
187 models.

188

## 189 MHR

190 First, to support the integrative modeling of the MHR complex, an *ab initio* 3D EM map for the  
191 MHR complex was produced by further analysis of the MHR 2D class averages reported in a  
192 previous study (Low et al., 2020). Integrative modeling of the 2:2:4 MHR complex produced  
193 effectively a single cluster of models (85% of a total of 15200 models) with a model precision  
194 of 27 Å; model precision is the average RMSD between the cluster centroid and models in the  
195 cluster (Fig. S3). The models fit very well to the input data as measured by the EM and crosslink  
196 scores. 98% of the input crosslinks were satisfied within their uncertainty (Fig. S6). An adipic  
197 acid dihydrazide (ADH) / bis(sulfosuccinimidyl)suberate - disuccinimidyl suberate (BS3DSS) /  
198 dimethoxy triazinyl methyl-morpholinium chloride (DMTMM) crosslink is violated if the  
199 corresponding cross-linked beads are greater than 35 / 35 / 25 Å apart in all models in the  
200 cluster. The cross-correlation between the localization probability density map for the models  
201 in the major cluster and the input EM map was 0.74, indicating the fit to EM is reasonable but  
202 not too high. This could partly be due to unoccupied density in the lobes of the experimental  
203 EM map.

204

205 Surprisingly, the representative bead model from the dominant cluster (cluster centroid model)  
206 shows the C-terminal half of the two MTA subunits (MTA1<sup>432-715</sup>) crossing over (brown and  
207 orange MTAs, Fig. 2A, Movie M1). Integrative models of the MHR complex created in the  
208 absence of the EM map also showed the MTAs crossing over (Fig. S9).

209  
210 The MTA1<sup>BAH</sup> domain (MTA1<sup>1-164</sup>) is positioned distal to the MTA1 dimerization interface  
211 (MTA1<sup>200-290</sup>, MTA1<sup>dimer</sup>), consistent with its position in an independent EM map (Fig. 2B, Fig.  
212 2C) (Millard et al., 2020). It is proximal to the HDAC1 active site and might regulate HDAC1  
213 activity (Fig. 2A). This conclusion is consistent with histone deacetylation assays in which MTA1  
214 was shown to modulate HDAC1 deacetylase activity in NuRD (Zhang et al., 1999). Further, for  
215 one of the MTAs, the MTA1<sup>BAH</sup> is located near an RBBP4 (Fig. 2A, Fig. 2B); MTA1<sup>BAH</sup> proximity  
216 to RBBP4 was also indicated in an independent cryo-EM map (Millard et al., 2020). Finally,  
217 MTA1<sup>BAH</sup> is also proximal to the MTA1<sup>mid</sup> region (MTA1<sup>334-431</sup>) containing the predicted helix (H)  
218 and zinc finger regions (ZF) (Fig. 2B, Fig. 2C).

219  
220 The MTA1<sup>mid</sup> region is juxtaposed between MTA1<sup>dimer</sup> and the MTA1<sup>BAH</sup> domain (Fig. 2B). In  
221 contrast, in a previous crosslink-based MHR model (Low et al., 2020), MTA1<sup>mid</sup> was proximal  
222 to the MTA1<sup>BAH</sup> domain and distal from the MTA1<sup>dimer</sup>. The MTA1 C-terminus (MTA1<sup>C</sup>; *i.e.*,  
223 MTA1<sup>692-715</sup>) shows considerable conformational heterogeneity and is co-located with MTA1<sup>USR</sup>  
224 (MTA1<sup>547-669</sup>), the MTA1 disordered region between the R1 and R2 RBBP4 binding regions  
225 (Fig. 2B, Movie M1). Overall, many MTA1 domains in the MHR model, such as MTA1<sup>BAH</sup>  
226 domain, MTA1<sup>mid</sup>, and MTA1<sup>C</sup>, are exposed and could interact with nucleosomal DNA and/or  
227 other proteins.

228  
229 The HDAC1 C-terminus (HDAC1<sup>C</sup>; *i.e.*, HDAC1<sup>377-482</sup>) interacts with the MTA1<sup>BAH</sup> domain (Fig.  
230 2B). Although it has been shown that the MTA1-HDAC1 dimer can form in the absence of  
231 MTA1<sup>BAH</sup> (Millard et al., 2013), this additional interaction between MTA1 and HDAC1 could be  
232 functionally important. Consistent with this possibility, mutations in HDAC1<sup>C</sup> ( $\Delta$ 391-482, S421A,  
233 S423A, E426A) have been known to disrupt binding to NuRD subunits (Pflum et al., 2001).  
234 There are also post-translational modifications in the HDAC1 tail that might modulate its  
235 interaction with MTA1 (Pflum et al., 2001; Rathert et al., 2008).

236  
237 Both the MTA1<sup>R1</sup>-RBBP4 units are located between the two lobes in the EM map, with one  
238 complex in the front and the other at the back (dark blue beads and densities, Fig. 2A-2C). On  
239 the other hand, the MTA1<sup>R2</sup>-RBBP4 complexes are located in separate lobes (light blue beads  
240 and densities, Fig. 2A-2C). The densities of RBBP4 are spread out, indicating its localization in  
241 MHR is imprecise (Fig. 2B, Movie M1). This is consistent with the structural heterogeneity  
242 observed in 2D class averages of the MHR EM data (Low et al., 2020). This flexibility could  
243 facilitate RBBP4 interactions with transcription factors and histones.

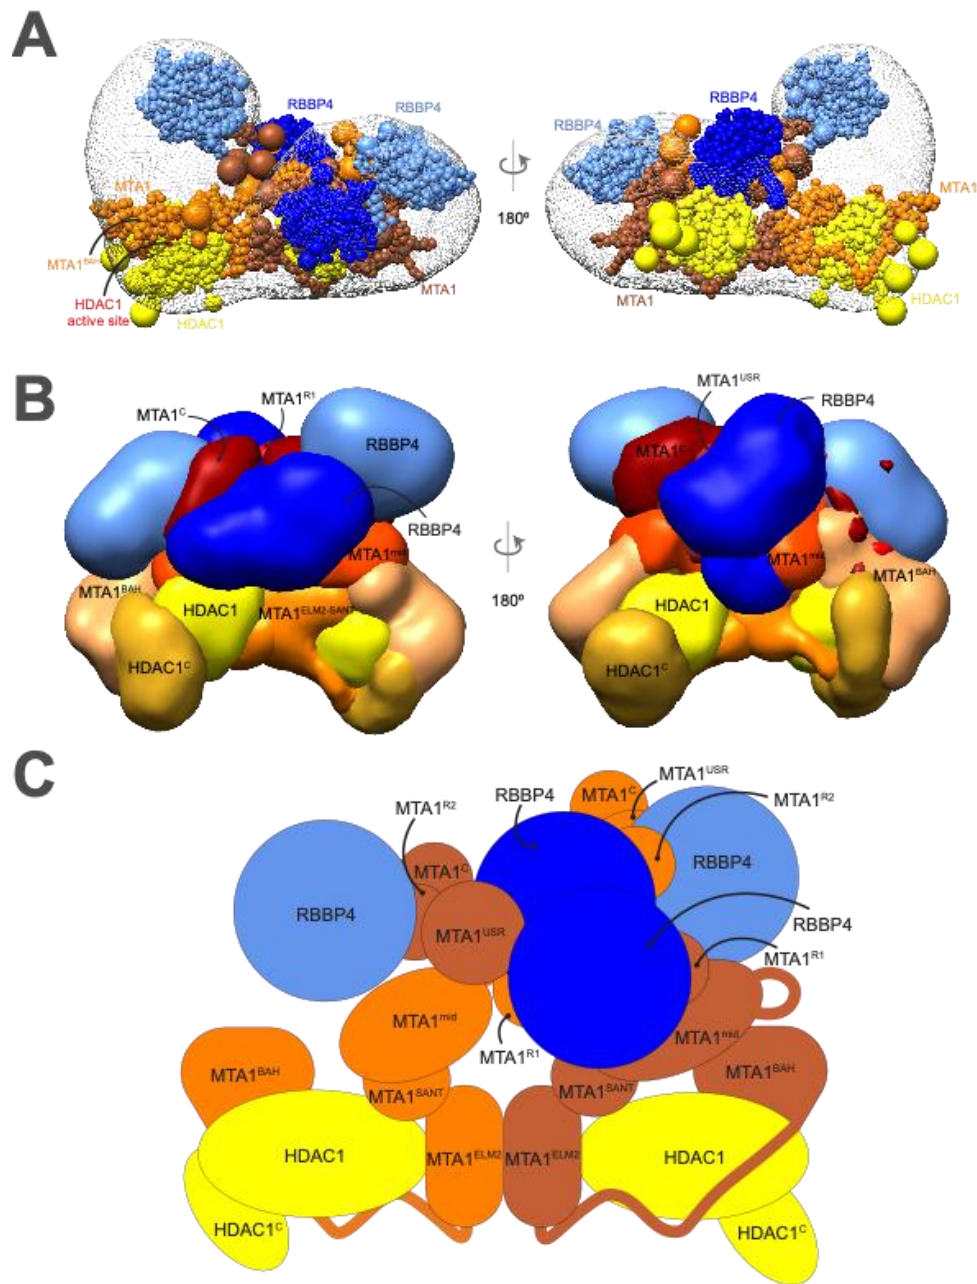

**Fig. 2 Integrative model of the MTA1-HDAC1-RBBP4 (MHR) complex** A. Representative bead model from the most populated cluster of integrative models for the MHR complex, shown with the MHR EM map. The model is colored by subunit. For MTA1, the two copies are shown in different colors (brown and orange) in panels A and C, to illustrate the crossover. The HDAC1 active site is shown in red. B. Localization probability density maps showing the position of different domains/subunits in the cluster. The map specifies the probability of any volume element being occupied by a domain in the ensemble of superposed models from the cluster. The domain densities are colored according to Fig. S1. These maps are contoured at ~10% of their respective maximum voxel values. C. Schematic representation of the integrative model of the MHR complex. See also Figs. S1, S3, S6, and Movie M1.

## MHM

Integrative modeling of the 2:2:2 MHM complex resulted in a major cluster containing 60% of 21960 models. The model precision was 24 Å and 99% of the input crosslinks were satisfied (Fig. S4, Fig. S7). The cross-correlation between the localization probability density map for the models in the major cluster and the input EM map was 0.90.



260

261 First, in a control run, where MHM was modeled as a 2:2:1 complex with a single copy of MBD3,  
262 we observed two symmetric MBD3 binding sites (Fig. S10). However, our 2:2:2 MHM model  
263 shows that the two copies of MBD3 bind asymmetrically on the MTA1-HDAC1 dimer (Fig. 3A-  
264 3C, Movie M2). One MBD3 localizes exclusively to one end of the MTA1-HDAC1 dimer, making  
265 contacts predominantly with a single MTA1 and HDAC1 (pink MBD3, Fig. 3C), whereas the  
266 other MBD3 is more spread out and interacts with both copies of MTA1 and HDAC1 (green  
267 MBD3, Fig. 3C).

268

269 In our models, both the copies of MBD3<sup>MBD</sup> localize close to the MTA1<sup>BAH</sup> domain, which is  
270 similar to the location observed for MBD2<sup>MBD</sup> in an independent cryo-EM map of a 2:2:1  
271 MTA1:HDAC1:MBD2 complex (Fig. 3A-3C) (Millard et al., 2020). Although there are two  
272 MBD3s in our models, only a single MBD3<sup>IDR</sup> localizes to the MTA1 dimerization interface,  
273 MTA1<sup>dimer</sup> (green MBD3, Fig. 3D-3E). This localization of MBD3<sup>IDR</sup> is consistent with its  
274 previously predicted localization from the crosslinks-based model (Low et al., 2020) and the  
275 localization of MBD2<sup>IDR</sup> based on cryo-electron microscopy (Millard et al., 2020). It is also  
276 supported by two separate mutagenesis and co-immunoprecipitation studies, one of which  
277 showed that MBD2<sup>IDR</sup> was essential for binding to the MTA1-HDAC1 dimer (Desai et al., 2015),  
278 while the other showed that MTA1<sup>dimer</sup> was essential for its interaction with MBD2 (Millard et al.,  
279 2020). It is known that MBD3 binding in NuDe/NuRD is asymmetric; although there are two  
280 symmetric MBD3 binding sites, there is a single MBD3 in these complexes (Low et al., 2020).  
281 It is possible that a single MBD3 is present in NuDe/NuRD since a single MBD3<sup>IDR</sup> can bind to  
282 the MTA1<sup>dimer</sup> (see also Discussion).

283

284 For both MBDs, the MBD3<sup>MBD</sup> domain is proximal to the MTA1<sup>BAH</sup> domain, and the MBD3<sup>IDR</sup> is  
285 close to the MTA1<sup>mid</sup> region (Fig. 3B, Fig. 3E). The MBD3<sup>CC</sup>-GATAD2<sup>CC</sup> coiled-coil domain is  
286 exposed. Finally, in a small minority of models, both MBDs are localized together on the same  
287 side of the MTA1<sup>dimer</sup>; however, we believe this latter configuration is possibly due to numerous  
288 intra-MBD3 crosslinks (Movie M2).

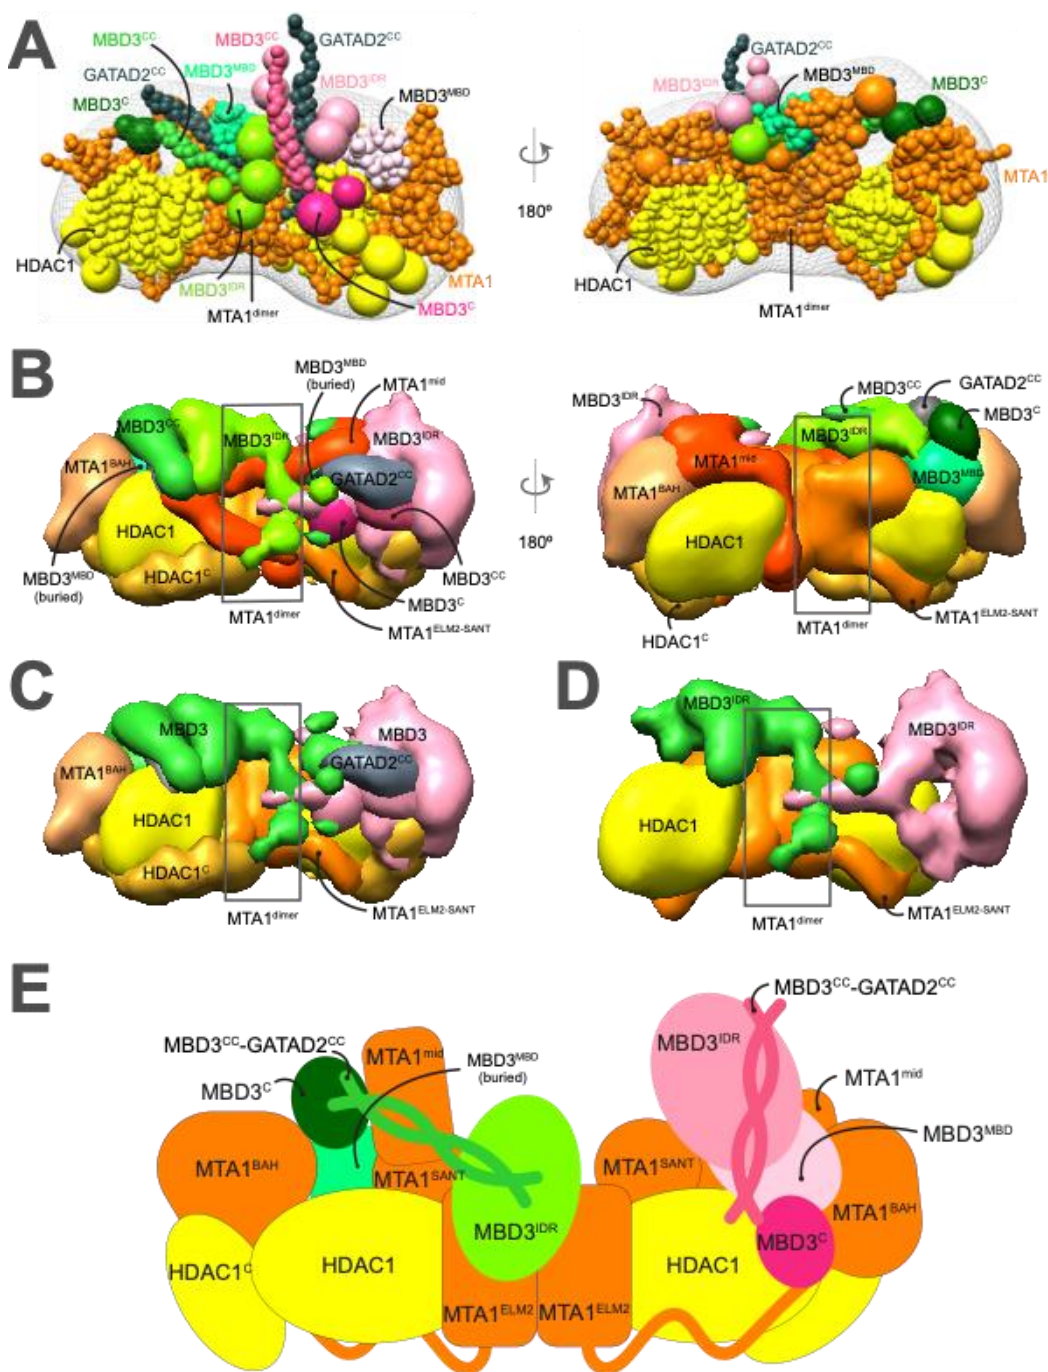

**Fig. 3 Integrative model of the MTA1<sup>N</sup>-HDAC1-MBD3<sup>GATAD2<sup>CC</sup></sup> (MHM) complex** A. Representative bead model from the major cluster of analyzed integrative models for the MHM complex, with the corresponding EM map (EMD-21382) (Low et al., 2020), colored by subunit. The domains of the two MBD3s are shown in shades of pink and green respectively. B. Localization probability density maps showing the position of different domains in the ensemble of models from the cluster. The domain densities are colored according to Fig S1. C. The same density maps as B (front view), showing the two MBDs in pink and green respectively, illustrating that they localize differently on the MTA1-HDAC1 dimer. The density maps of MTA1<sup>mid</sup> and GATAD2<sup>CC</sup> were omitted for clarity. D. The density maps of the two MBD3<sup>IDR</sup> domains on the MTA1-HDAC1 dimer. Almost all the maps are contoured at 20% of their respective maximum voxel values (GATAD2 maps are contoured at 27% whereas MBD3<sup>IDR</sup> maps are contoured at 10%). E. Schematic representation of the integrative model of the MHM complex. Note that MTA1<sup>mid</sup> in this model corresponds to MTA1<sup>334-431</sup>. See also Figs. S1, S4, S7, and Movie M2.

289  
290  
291  
292  
293  
294  
295  
296  
297  
298  
299  
300  
301

## 302 NuDe

303 Although the NuDe complex contains full-length GATAD2, due to the lack of information on full-  
304 length GATAD2, we modeled only the GATAD2 region that forms a coiled-coil with MBD3.  
305 Integrative modeling of the NuDe complex resulted in effectively a single cluster (99% of 21632  
306 models). The model precision was 35 Å and 99% of the input crosslinks were satisfied (Fig. S5,  
307 Fig. S8). The cross-correlation between the localization probability density map for the models  
308 in the major cluster and the input EM map was 0.88.

309  
310 In contrast to our MHM model, where one MBD3 was proximal to the MTA1<sup>SANT</sup> domain, MBD3  
311 in NuDe localizes precisely to one end of the MTA1-HDAC1 dimer, away from the MTA1<sup>SANT</sup>  
312 domain. It is juxtaposed next to the MTA1<sup>BAH</sup> and MTA1<sup>mid</sup> domains, as well as HDAC1 (Fig.  
313 4A-4C, Movie M3). An independent cryo-EM map of MTA1<sup>1-546</sup>-HDAC1-MBD2-RBBP4 also  
314 showed that MBD3 was proximal to MTA1<sup>BAH</sup> and MTA1<sup>dimer</sup> (Millard et al., 2020). It is possible  
315 that the presence of GATAD2 sterically precludes MBD3 from occupying the MTA1 dimerization  
316 interface (see also Discussion).

317  
318 From protein-protein distance maps of the cluster, HDAC1<sup>60-100</sup> and MTA1<sup>BAH</sup> are most proximal  
319 to MBD3 (Fig. S11A, S11B). MBD3<sup>CC</sup>-GATAD2<sup>CC</sup> is exposed. The MBD3<sup>MBD</sup> domain is buried,  
320 consistent with the failure of MBD3 to bind DNA in NuRD noted in immuno-precipitation  
321 experiments (Fig. 4A-4C) (Zhang et al., 1999). Interestingly, several nucleosome-interacting  
322 domains such as MTA1<sup>BAH</sup> and MTA1<sup>ZF</sup> are co-localized in the NuDe model (Fig. 4A-4C).

323  
324 Similar to the MHR models, the HDAC1<sup>C</sup> domain is proximal to MTA1<sup>BAH</sup> (Fig. S11C).  
325 Mutagenesis and co-immunoprecipitation studies have shown that HDAC1<sup>C</sup> makes critical  
326 interactions with NuRD subunits (Pflum et al., 2001). In contrast to the MHR models which  
327 showed crossover of MTAs, the two MTAs are well-separated in NuDe (Fig. 4A-4C). The  
328 localization of RBPs is also more precise in NuDe than in MHR (Fig. S12).

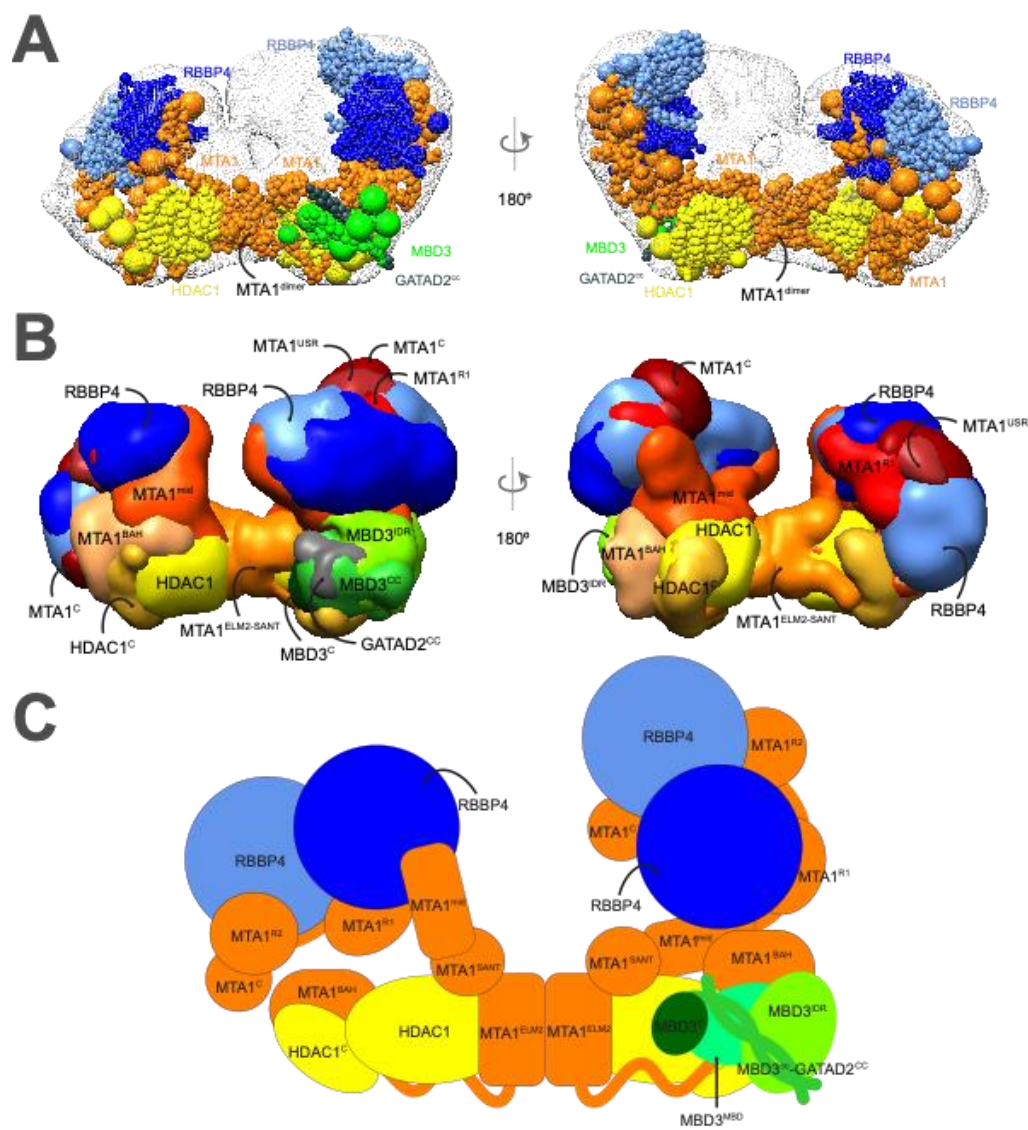

329  
 330 **Fig. 4 Integrative model of the nucleosome deacetylase (NuDe) complex** A. Representative bead model from  
 331 the dominant cluster of integrative models for the NuDe complex, with the corresponding EM map (EMD-22904)  
 332 (Low et al., 2020), colored by subunit. B. Localization probability density maps showing the position of different  
 333 domains in the ensemble of models from the cluster. The domain densities are colored according to Fig S1. Maps  
 334 are contoured at ~10% of their respective maximum voxel values. C. Schematic representation of the integrative  
 335 model of the NuDe complex. See also Figs. S1, S5, S8, S11, and Movie M3.  
 336  
 337

### 338 Mapping COSMIC mutations

339 We next consulted the COSMIC (Catalogue of Somatic Mutations in Cancer) database for  
 340 somatic, confirmed pathogenic, point mutations of the NuRD subunits, MTA1, HDAC1, RBBP4,  
 341 and MBD3 (Forbes et al., 2006). In total, 356 point mutations were identified and mapped onto  
 342 the cluster of NuDe integrative models (Methods, 4.5 COSMIC data analysis). Analysis of these  
 343 mutations revealed that 74% of mutations mapped to protein-protein interfaces within NuDe;  
 344 for this analysis, a mutation was considered to be at an interface if the average distance of the  
 345 corresponding residue to a residue in an interacting protein is less than 10 Å. 29% of the  
 346 mapped mutations were located in previously uncharacterized binding interfaces predicted by  
 347 our model, such as MBD3-MTA1<sup>BAH</sup>, MBD3-HDAC1<sup>60-100</sup>, and HDAC1<sup>C</sup>-MTA1<sup>BAH</sup>, consistent  
 348 with the idea that these interfaces are important for NuRD function (Fig. 5, Fig. S13, Table S1).



349 Mutations at protein-protein interfaces could alter protein-protein interactions, reducing the  
 350 stability of the complex, thereby leading to pathogenicity. Moreover, 19% of all mutations  
 351 mapped to exposed regions that are known to bind to nucleosomes and transcription factors,  
 352 such as the HDAC1 active site and RBBP4 H3 interaction site (Fig. 5, Fig. S13, Table S1).  
 353 These mutations could impair NuRD binding to partners such as nucleosomes or transcription  
 354 factors, contributing to the pathogenesis of disease. Of the 19% that map to exposed regions,  
 355 more than half (57%) of the mutations map to regions of unknown structure (regions for which  
 356 no experimental structure or reliable model is available), such as MTA1<sup>USR</sup> and MBD3<sup>IDR</sup> (Fig.  
 357 5, Table S1). The functional significance of these mutations is therefore difficult to predict, but  
 358 could indicate that these regions of unknown structure also have important roles in protein  
 359 stability, regulating interactions between NuRD subunits, or interactions with binding partners  
 360 of NuRD. An important consideration for all these disease-causing mutations is that many of  
 361 the NuRD subunits function in cellular contexts independent of other NuRD subunits, and so in  
 362 some cases, these mutations may be rationalised in the context of other functional roles.

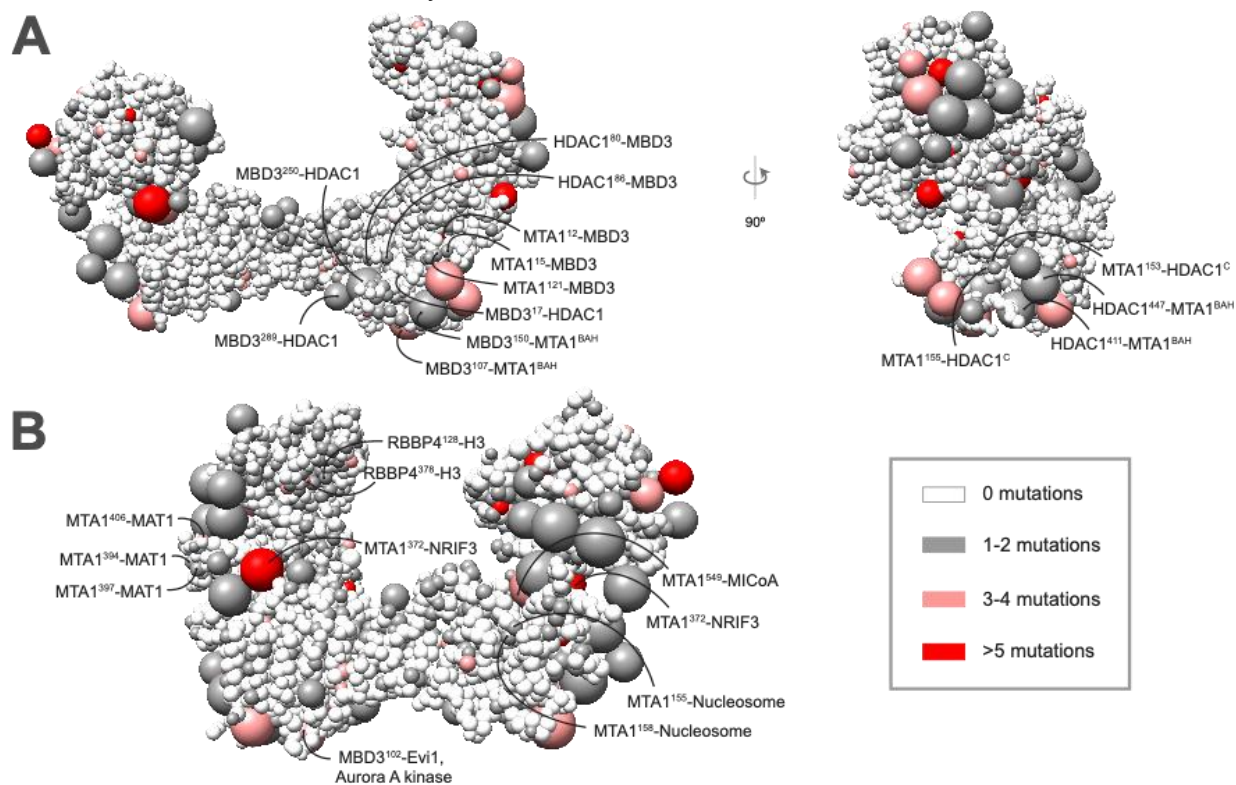

363  
 364 **Fig. 5 COSMIC mutations mapped onto the NuDe integrative model.** Somatic pathogenic point mutations from  
 365 the COSMIC database (Forbes et al., 2006) mapped onto the representative bead model of the NuDe complex  
 366 (Fig. 4A). A. Mutations of residues that map to previously undescribed protein-protein interfaces within our model.  
 367 Residues from two proteins are at an interface if the average distance between their corresponding bead surfaces  
 368 is less than 10 Å in the cluster of NuDe integrative models. B. Mutations on residues that map to exposed binding  
 369 sites between modeled proteins and known binding partners. A bead is colored according to the maximum number  
 370 of mutations on any residue in the bead, according to the legend. Representative mutations are labeled in both A.  
 371 and B. See also Table S1 and Fig. S13.

### 373 Docking the nucleosome

374 We next attempted to dock the CHD4-nucleosome structure (Farnung et al., 2020) into the cleft  
 375 in the NuDe structure between the MTA1 C-terminal arms (Fig. 6). Although there are limitations  
 376 to this docking (for example, it is a coarse placement, lacks histone tail densities, and binding  
 377 sites for the nucleosome outside the cleft might also exist), this positioning of the nucleosome  
 378 indicates its size complementarity to the integrative model, further corroborating the latter. This

379 placement allows for the histone H3 and H4 tails to be located towards the HDAC1 active site.  
380 It also accommodates the known interactions between the RBBPs and the histone H3 (Fig. 6).  
381 The partial CHD4 structure is exposed. MTA1<sup>mid</sup>, which contains the zinc finger, can also  
382 potentially interact with the nucleosome in this position. Finally, MBD3 does not interact with  
383 the nucleosome, since MBD3<sup>MBD</sup> is buried in NuDe (Fig. 4A-4C), consistent with MBD3 in NuRD  
384 failing to bind DNA in immuno-precipitation experiments (Zhang et al., 1999).  
385

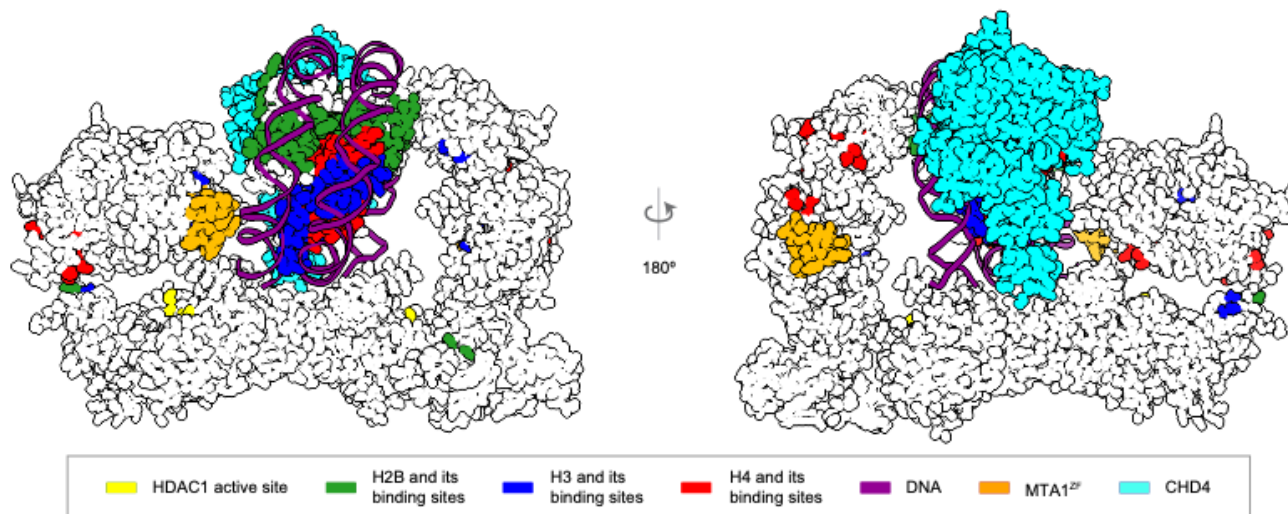

**Fig. 6 Integrative model of NuDe complex with the nucleosome** The CHD4-nucleosome structure (Farnung et al., 2020) is placed in the cleft of the NuDe integrative model. The regions with known atomic structure are shown in the NuDe integrative model from Fig. 4A. Nucleosome proteins/DNA and the corresponding NuDe subunit residues they are known to bind to, are depicted in the same color, as given by the legend.

## 392 Discussion

393 Here, we obtained structural models of the MTA1-HDAC1-RBBP4 (MHR), MTA1<sup>N</sup>-HDAC1-  
394 MBD3 (MHM), and MTA1-HDAC1-RBBP4-MBD3-GATAD2 (NuDe) complexes using Bayesian  
395 integrative modeling. The approach allowed us to combine all available structural information,  
396 including data from SEC-MALLS, DIA-MS, chemical crosslinking mass spectrometry (XLMS),  
397 negative stain EM, X-ray crystallography, NMR spectroscopy, secondary structure, and  
398 homology predictions (Methods, Fig. 1) (Alqarni et al., 2014; Connelly et al., 2006; Cramer et  
399 al., 2014; Gnanapragasam et al., 2011; Low et al., 2020; Millard et al., 2016, 2013; Söding et  
400 al., 2005; Tjandra et al., 1997). The models were corroborated by independent cryo-EM maps,  
401 enzyme assays, mutagenesis, co-immunoprecipitation studies, and the mapping of cancer  
402 mutations (Fig. 5, Fig. S13, Table S1) (Desai et al., 2015; Forbes et al., 2006; Millard et al.,  
403 2020; Pflum et al., 2001; Zhang et al., 1999). Importantly, our approach allowed us to localize  
404 regions of unknown structure, for e.g., HDAC1<sup>C</sup> and MBD3<sup>IDR</sup>, in context of regions of known  
405 structure, for e.g., the MTA1-HDAC1 dimer, resulting in the most complete structural  
406 characterization of these NuRD sub-complexes so far.  
407

## 408 NuDe complex is more ordered than MHR

409 A comparison of MTA1 and RBBP4 in the MHR and NuDe models suggests that these subunits  
410 are more conformationally heterogeneous in MHR, as shown by the broader localization  
411 probability densities for the C-terminal half of MTA1 and RBBPs in MHR (volume enclosed by  
412 the corresponding maps = 1120 nm<sup>3</sup>) compared to NuDe (volume enclosed = 883.6 nm<sup>3</sup>) (Fig.  
413 S12). Also, the cross-correlation of the MHR localization probability density to the

414 corresponding EM map is lower than that of NuDe, indicating higher heterogeneity for the  
 415 former. This indicates that the MHR is initially dynamic and the presence of MBD3-GATAD2  
 416 possibly makes it less dynamic.  
 417

### 418 **MBD3<sup>IDR</sup> – MTA1<sup>dimer</sup> interaction**

419 In our MHM models, one MBD3<sup>IDR</sup> is near the MTA1<sup>dimer</sup>, consistent with the previously  
 420 predicted localization of MBD3<sup>IDR</sup> based on chemical crosslinks (Low et al., 2020) and MBD2<sup>IDR</sup>  
 421 based on a cryo-electron density map (Fig. 3C-3E) (Millard et al., 2020). Two separate  
 422 mutagenesis and co-immunoprecipitation studies have shown that the MBD<sup>IDR</sup> and the MTA1  
 423 dimerization interface are each essential for MBD2 interaction with the MTA1-HDAC1 dimer  
 424 (Desai et al., 2015; Millard et al., 2020). Despite the corresponding region of MBD2 being  
 425 disordered in solution (Desai et al., 2015), MBD3<sup>125-175</sup> is predicted to be ordered based on  
 426 PONDR<sup>®</sup> analysis (Fig. S14) (<http://www.pondr.com>) (Romero et al., 2001, 1997). Because this  
 427 region is well conserved across species (Cramer et al., 2017), it is likely that it becomes ordered  
 428 upon binding, similar to the region of MTA1 that winds irregularly across the surface of HDAC1  
 429 (MTA1<sup>165-226</sup>). Further, the crosslinks between MBD3<sup>IDR</sup> and MTA1 involve a loop (MTA1<sup>229-236</sup>)  
 430 of the MTA1<sup>dimer</sup> that is not visible in the MTA1-HDAC1 crystal structure. It is possible that this  
 431 region of MTA1 may also become ordered upon binding MBD3.

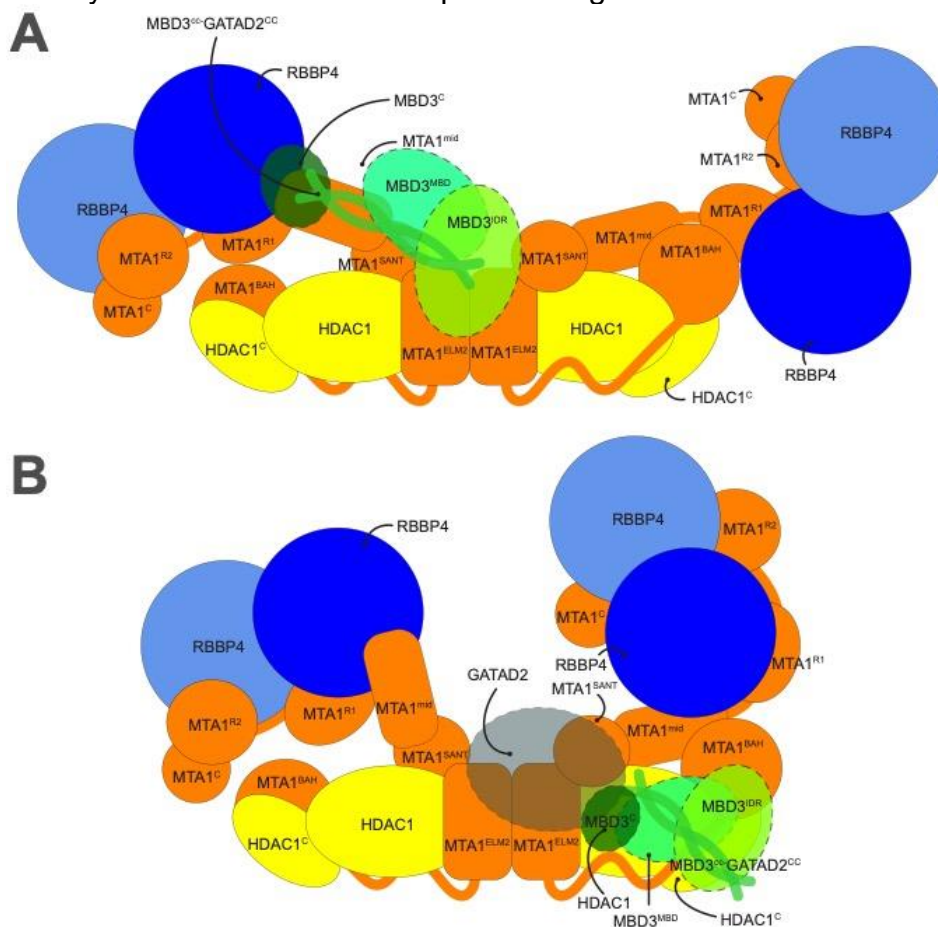

432 **Fig. 7 Bind-and-shift model of MBD3 binding to MHR** The figure shows two stages of MBD3 assembly in NuRD.  
 433 A. In the first stage, the MTA1 dimerization interface is accessible for MBD3<sup>IDR</sup> to bind. B. In the second stage,  
 434 upon binding, MBD3 recruits GATAD2 and the chromatin remodeling module and shifts to one end of the MTA1-  
 435 HDAC1 dimer. GATAD2 localizes near MTA1dimer, precluding a second MBD3 from binding to it.  
 436  
 437  
 438



## 439 **Bind-and-shift model of MBD3 binding to MHR**

440 The stoichiometry of MBD3 in NuRD is intriguing. The MHM complex has two copies of MBD3,  
441 while a single MBD3 is seen in the NuDe and NuRD complexes (Low et al., 2020). Based on  
442 our integrative models, we propose a two-stage mechanism to explain the asymmetric binding  
443 of MBD3 in NuRD (Fig. 7).

444  
445 In the first stage (Fig. 7A), the C-terminal arms of MTA1 in MHR are heterogenous and adopt  
446 a range of configurations including an extended, open state (Millard et al., 2020) and crossed-  
447 over state (Fig. 2, MHR models). In the open state, the MTA1 dimerization interface is  
448 accessible for MBD3<sup>IDR</sup> to bind. This interaction of MBD3<sup>IDR</sup> with the MTA1<sup>dimer</sup> is also observed  
449 in a cryo-EM study on MTA1:HDAC1:MBD2 and is known to be critical for MBD recruitment to  
450 the deacetylase module (Fig. 3, MHM models) (Desai et al., 2015; Millard et al., 2020).

451  
452 In the second stage (Fig. 7B), upon binding to MTA1<sup>dimer</sup>, MBD3 recruits GATAD2 and the  
453 chromatin remodeling module and shifts to one end of the MTA1-HDAC1 dimer (Fig. 4, NuDe  
454 models). In this state, GATAD2 localizes near MTA1<sup>dimer</sup>, precluding a second MBD3 from  
455 binding to it. Although we did not model full GATAD2 in NuDe due to unavailability of structures  
456 and crosslinks involving the protein, the proximity of CHD4, and hence GATAD2, to the  
457 MTA1<sup>dimer</sup> in our coarse nucleosome docking supports this idea (Fig. 6). This possibly explains  
458 how GATAD2 introduces asymmetry of MBD3 binding in NuRD. Moreover, upon binding  
459 the chromatin remodeling module, the C-terminal arms of MTA1 with the RBPs are less  
460 heterogenous and adopt a closed configuration (Fig. 4, Fig. S12).

461  
462 The novel NuRD protein interfaces predicted by our model need to be confirmed by future  
463 experiments. High-resolution structures of regions such as MBD3<sup>IDR</sup> will delineate their roles in  
464 NuRD. Ultimately, a complete atomic characterization of the NuRD complex will aid in  
465 understanding NuRD-mediated regulation of gene expression.

466

## 467 **Materials and Methods**

### 468 **Integrative modeling**

469 The integrative structure determination of the NuRD sub-complexes proceeded through four  
470 stages (Fig. 1) (Alber et al., 2007; Rout and Sali, 2019; Russel et al., 2012). The modeling  
471 protocol (i.e., stages 2, 3, and 4) was scripted using the Python Modeling Interface (PMI)  
472 package, a library for modeling macromolecular complexes based on open-source Integrative  
473 Modeling Platform (IMP) package, version 2.13.0 (<https://integrativemodeling.org>) (Russel et  
474 al., 2012). The current procedure is an updated version of previously described protocols  
475 (Ganesan et al., 2020; Gutierrez et al., 2020; Kim et al., 2018; Saltzberg et al., 2019, 2021;  
476 Viswanath et al., 2017a; Webb et al., 2018). Files containing the input data, scripts, and output  
477 results are publicly available at <https://github.com/isblab/nurd>.

478

### 479 **Stage 1: Gathering data**

480 The stoichiometry and isoforms of subunits were based on DIA-MS and SEC-MALLS  
481 experiments (Fig. S1) (Low et al., 2020). Known atomic structures were used for the MTA1-  
482 HDAC1 dimer, MTA1<sup>R1</sup> and MTA1<sup>R2</sup> domains in complex with RBBP4, and MBD domain of  
483 MBD3 (Fig. S1) (Alqarni et al., 2014; Cramer et al., 2014; Millard et al., 2016, 2013). The  
484 MTA1<sup>BAH</sup> domain, MTA1<sup>H</sup>, MTA1<sup>ZF</sup>, and MBD3<sup>CC</sup>-GATAD2A<sup>CC</sup> structures were homology-  
485 modeled based on the structures of related templates (Fig. S1A) (Connelly et al., 2006;  
486 Gnanapragasam et al., 2011; Tjandra et al., 1997).



487

488 The shapes of the complexes were based on 3D negative-stain EM maps; MHR: to be  
489 deposited (24.56 Å), MHM: EMD-21382 (20 Å), and NuDe: EMD-22904 (20 Å) (Low et al.,  
490 2020). The negative-stained EM map for the MHR complex was produced by further analysis  
491 of data reported in a previous study (Fig. S2) (Low et al., 2020). 25,155 particle images were  
492 subjected to multiple rounds of 2D classification in CryoSparc (Punjani et al., 2017), following  
493 which an *ab initio* 3D reconstruction was obtained and refined by homogenous 3D refinement.  
494 The final map was produced from 13,299 particles and had an estimated resolution of ~25 Å  
495 according to the FSC0.143 criterion.

496

497 Chemical crosslinks informed the relative localization of the NuRD subunits. A total of 936  
498 crosslinks, including 877 BS3DSS (bis(sulfosuccinimidyl)suberate - disuccinimidyl suberate),  
499 40 DMTMM (dimethoxy triazinyl methyl-morpholinium chloride), and 19 ADH (adipic acid  
500 dihydrazide) crosslinks were used (Low et al., 2020). The models were validated by  
501 independent EM maps (Millard et al., 2020), biochemical assays (Desai et al., 2015; Pflum et  
502 al., 2001; Zhang et al., 1999), and human cancer-associated mutations on NuRD proteins  
503 (Forbes et al., 2006).

504

## 505 **Stage 2: Representing the system and translating data into spatial restraints**

506 The stoichiometry and representation of subunits is shown (Fig. S1). The domains with known  
507 atomic structures were represented in a multi-scale manner with 1 and 10 residues per bead to  
508 maximize computational efficiency. These domains were modeled as rigid bodies where the  
509 relative distances between beads is constrained during sampling. In contrast, domains without  
510 known structure were coarse-grained at 30 residues per bead and modeled as flexible strings  
511 of beads.

512

513 We next encoded the spatial restraints into a scoring function based on the information  
514 gathered in Stage 1, as follows:

515 (1) *Cross-link restraints*: The Bayesian cross-links restraint (Rieping et al., 2005) was used to  
516 restrain the distances spanned by the cross-linked residues (Shi et al., 2014).

517 (2) *EM restraints*: The Bayesian EM density restraint was used to restrain the shape of the  
518 modeled complexes and was based on the cross-correlation between the Gaussian Mixture  
519 Model (GMM) representations of the NuRD subunits and the GMM representation of the  
520 corresponding negative-stain EM density maps (Bonomi et al., 2019).

521 (3) *Excluded volume restraints*: The excluded volume restraints were applied to each bead,  
522 using the statistical relationship between the volume and the number of residues that it covered  
523 (Alber et al., 2007).

524 (4) *Sequence connectivity restraints*: We applied the sequence connectivity restraints, using a  
525 harmonic upper distance bound on the distance between consecutive beads in a subunit, with  
526 a threshold distance equal to twice the sum of the radii of the two connected beads. The bead  
527 radius was calculated from the excluded volume of the corresponding bead, assuming standard  
528 protein density (Shi et al., 2014).

529

530 **Stage 3: Structural sampling to produce an ensemble of structures that satisfies the**  
531 **restraints**

532 We aimed to maximize the precision at which the sampling of good-scoring solutions was  
533 exhaustive (Stage 4). The sampling runs relied on Gibbs sampling, based on the Replica  
534 Exchange Monte Carlo algorithm (Saltzberg et al., 2019, 2021). The positions of the rigid bodies  
535 (domains with known structure) and flexible beads (domains with unknown structure) were  
536 sampled.

537  
538 The initial positions of the flexible beads and rigid bodies in all complexes were randomized,  
539 with one exception. For MHR, we were able to unambiguously dock the structure of the MTA1-  
540 HDAC1 core in the EM map, with the help of the previous EM map (EMD-3399) (Millard et al.,  
541 2016). Hence, the position of the corresponding rigid body was fixed throughout.

542  
543 The Monte Carlo moves included random translations of individual beads in the flexible  
544 segments and rigid bodies (around 3.7 Å and 1.3 Å respectively). A model was saved every 10  
545 Gibbs sampling steps, each consisting of a cycle of Monte Carlo steps that moved every bead  
546 and rigid body once.

547  
548 The sampling produced a total of 40 million MHR, 48 million MHM, and 80 million NuDe  
549 integrative models.

550

551 **Stage 4: Analysing and validating the ensemble of structures and data**

552 The sampled models were analysed to assess sampling exhaustiveness and estimate the  
553 precision of the structure, its consistency with input data and consistency with data not used in  
554 modeling. The structure was further validated by experiments based on the predictions from  
555 the models. We used the analysis and validation protocol published earlier (Rout and Sali,  
556 2019; Saltzberg et al., 2019, 2021; Viswanath et al., 2017b). Assessment began with a test of  
557 the thoroughness of structural sampling, including structural clustering of the models,  
558 estimating model precision, and visualizing the variability in the ensemble of structures using  
559 localization probability density maps (Viswanath et al., 2017b). The precision of a domain refers  
560 to its positional variation in an ensemble of superposed models. It can also be visualized by the  
561 localization probability density map for the domain. A localization probability density map  
562 specifies the probability of a voxel (3D volume unit) being occupied by a bead in a set of  
563 superposed models. The models and densities were visualized with UCSF Chimera and  
564 ChimeraX (Pettersen et al., 2021, 2004).

565

566 (1) *Determining good-scoring models*

567 Starting from the millions of sampled models, first, we selected models obtained after score  
568 equilibration and clustered them based on the restraint scores (Saltzberg et al., 2021). For  
569 further analysis, we considered 15200 MHR, 21960 MHM, and 21632 NuDe good-scoring  
570 models that satisfy the data restraints sufficiently well.

571

572 (2) *Clustering and structure precision*

573 We next assessed the sampling exhaustiveness and performed structural clustering (Saltzberg  
574 et al., 2019, 2021; Viswanath et al., 2017b). Integrative structure determination resulted in  
575 effectively a single cluster for all complexes, at a precision of 26.8 Å (MHR), 23.8 Å (MHM), and  
576 34.6 Å (NuDe). The cluster precision is the bead RMSD from the cluster centroid model  
577 averaged over all models in the cluster (Viswanath et al., 2017b).

578

579 (3) *Fit to input information*

580 The dominant clusters from each modeled NuRD sub-complex satisfied over 95% of all the  
581 BS3DSS, ADH, and DMTMM crosslinks used; a crosslink is satisfied by a cluster of models if  
582 the corresponding C $\alpha$ -C $\alpha$  distance in any model in the cluster is less than 35Å, 35Å, 25Å for  
583 BS3DSS, ADH, and DMTMM crosslinks respectively. The agreement between the models and  
584 the corresponding EM maps was computed by calculating the cross-correlation of the combined  
585 localization probability densities of all subunits for the major cluster with the experimental EM  
586 map using the *fitmap* tool in UCSF Chimera (Fig. 2-4) (Pettersen et al., 2004). The remainder  
587 of the restraints are harmonic, with a specified standard deviation. The cluster generally  
588 satisfied the excluded volume and sequence connectivity restraints. A restraint is satisfied by a  
589 cluster of models if the restrained distance in any model in the cluster (considering restraint  
590 ambiguity) is violated by less than 3 standard deviations, specified for the restraint. Most of the  
591 violations are small, and can be rationalized by local structural fluctuations, coarse-grained  
592 representation of the model, and/or finite structural sampling.

593

594 (4) *Fit to data not used in modeling*

595 The MHR integrative models were supported by histone deacetylation assays, mutagenesis,  
596 and co-immunoprecipitation, showing that MTA1 and the HDAC1<sup>C</sup> regulate HDAC1  
597 deacetylase activity and NuRD assembly (Pflum et al., 2001; Zhang et al., 1999). The  
598 localization of domains such as MTA1<sup>BAH</sup> and RBBP4 were validated by their consistency with  
599 independently determined cryo-EM maps (Millard et al., 2020).

600

601 The MHM integrative models were supported by independent cryo-EM maps of the complex  
602 showing similar localizations for MBD2<sup>MBD</sup> and MTA1<sup>BAH</sup> (Millard et al., 2020). The MBD3<sup>IDR</sup>-  
603 MTA1<sup>dimer</sup> interaction was also supported by two separate mutagenesis and co-  
604 immunoprecipitation studies (Desai et al., 2015; Millard et al., 2020).

605

606 The NuDe integrative models were corroborated by immunoprecipitation experiments showing  
607 that the MBD domain of MBD3 is buried in NuRD (Zhang et al., 1999). They were also  
608 supported by independent cryo-EM maps showing that MBD3 is proximal to MTA1<sup>BAH</sup>, and  
609 biochemical assays showing the importance of HDAC1<sup>C</sup> interactions in NuRD (Millard et al.,  
610 2020; Pflum et al., 2001). The mapping of cancer mutations to protein-protein interfaces in the  
611 NuDe model also supported them (Fig. 5, Fig. S13, Table S1) (Forbes et al., 2006).

612

613 *4.1 Mapping COSMIC mutations*

614 We obtained a total of 356 somatic, confirmed pathogenic, point mutations for the modeled  
615 NuRD subunits (MTA1, HDAC1, RBBP4, MBD3) from the COSMIC (Catalogue of Somatic  
616 Mutations in Cancer) database (Forbes et al., 2006). For each subunit, point mutations were  
617 selected from search results based on the presence of census genes and correct  
618 documentation of current structures. To ensure the mutations studied significantly affect the  
619 function, folding, and protein-protein interaction of the protein, the “confirmed pathogenic” and  
620 “somatic” filters were applied in all cases.

621

622

623

## 624 Acknowledgements

625 We thank Vinothkumar Kutti Ragunath and lab members Satwik Pasani, Praveen Roy DS, and  
626 Varun Ullanat for useful comments on the manuscript.

627

628 Molecular graphics images were produced using the UCSF Chimera and UCSF ChimeraX  
629 packages from the Resource for Biocomputing, Visualization, and Informatics at the University  
630 of California, San Francisco (supported by NIH P41 RR001081).

## 631 Funding

632 This work has been supported by the following grants: Department of Atomic Energy (DAE)  
633 TIFR grant RTI 4006 and Department of Science and Technology (DST) SERB grant  
634 SPG/2020/000475 from the Government of India to S.V, National Health and Medical Research  
635 Council of Australia project grants: APP1012161, APP1063301, APP1126357 to M.J.L. and  
636 J.P.M. and a fellowship (APP1058916) from the same organization to J.P.M.

637

## 638 Conflict of Interest

639 None declared.

640

## 641 References

- 642 Alber, F., Dokudovskaya, S., Veenhoff, L.M., Zhang, W., Kipper, J., Devos, D., Suprpto, A., Karni-  
643 Schmidt, O., Williams, R., Chait, B.T., Rout, M.P., Sali, A., 2007. Determining the architectures  
644 of macromolecular assemblies. *Nature* 450, 683–694. <https://doi.org/10.1038/nature06404>
- 645 Alqarni, S.S.M., Murthy, A., Zhang, W., Przewloka, M.R., Silva, A.P.G., Watson, A.A., Lejon, S., Pei,  
646 X.Y., Smits, A.H., Kloet, S.L., Wang, H., Shepherd, N.E., Stokes, P.H., Blobel, G.A., Vermeulen,  
647 M., Glover, D.M., Mackay, J.P., Laue, E.D., 2014. Insight into the Architecture of the NuRD  
648 Complex. *J. Biol. Chem.* 289, 21844–21855. <https://doi.org/10.1074/jbc.M114.558940>
- 649 Basta, J., Rauchman, M., 2017. Chapter 3 - The Nucleosome Remodeling and Deacetylase Complex in  
650 Development and Disease, in: Laurence, J., Beusekom, M.V. (Eds.), *Translating Epigenetics to*  
651 *the Clinic*. Academic Press, Boston, pp. 37–72. [https://doi.org/10.1016/B978-0-12-800802-](https://doi.org/10.1016/B978-0-12-800802-7.00003-4)  
652 [7.00003-4](https://doi.org/10.1016/B978-0-12-800802-7.00003-4)
- 653 Basta, J., Rauchman, M., 2015. The nucleosome remodeling and deacetylase complex in development  
654 and disease. *Transl. Res. J. Lab. Clin. Med.* 165, 36–47. <https://doi.org/10.1016/j.trsl.2014.05.003>
- 655 Bode, D., Yu, L., Tate, P., Pardo, M., Choudhary, J., 2016. Characterization of Two Distinct Nucleosome  
656 Remodeling and Deacetylase (NuRD) Complex Assemblies in Embryonic Stem Cells\*. *Mol.*  
657 *Cell. Proteomics* 15, 878–891. <https://doi.org/10.1074/mcp.M115.053207>
- 658 Bonomi, M., Hanot, S., Greenberg, C.H., Sali, A., Nilges, M., Vendruscolo, M., Pellarin, R., 2019.  
659 Bayesian Weighing of Electron Cryo-Microscopy Data for Integrative Structural Modeling.  
660 *Structure* 27, 175-188.e6. <https://doi.org/10.1016/j.str.2018.09.011>
- 661 Bornelöv, S., Reynolds, N., Xenophontos, M., Gharbi, S., Johnstone, E., Floyd, R., Ralser, M., Signolet,  
662 J., Loos, R., Dietmann, S., Bertone, P., Hendrich, B., 2018. The Nucleosome Remodeling and  
663 Deacetylation Complex Modulates Chromatin Structure at Sites of Active Transcription to Fine-  
664 Tune Gene Expression. *Mol. Cell* 71, 56-72.e4. <https://doi.org/10.1016/j.molcel.2018.06.003>
- 665 Burgold, T., Barber, M., Kloet, S., Cramard, J., Gharbi, S., Floyd, R., Kinoshita, M., Ralser, M.,  
666 Vermeulen, M., Reynolds, N., Dietmann, S., Hendrich, B., 2019. The Nucleosome Remodelling



- 667 and Deacetylation complex suppresses transcriptional noise during lineage commitment. *EMBO*  
668 *J.* 38, e100788. <https://doi.org/10.15252/embj.2018100788>
- 669 Connelly, J.J., Yuan, P., Hsu, H.-C., Li, Z., Xu, R.-M., Sternglanz, R., 2006. Structure and Function of  
670 the *Saccharomyces cerevisiae* Sir3 BAH Domain. *Mol. Cell. Biol.* 26, 3256–3265.  
671 <https://doi.org/10.1128/MCB.26.8.3256-3265.2006>
- 672 Cramer, J.M., Pohlmann, D., Gomez, F., Mark, L., Kornegay, B., Hall, C., Siraliev-Perez, E., Walavalkar,  
673 N.M., Sperlazza, M.J., Bilinovich, S., Prokop, J.W., Hill, A.L., Williams, D.C., 2017.  
674 Methylation specific targeting of a chromatin remodeling complex from sponges to humans. *Sci.*  
675 *Rep.* 7, 40674. <https://doi.org/10.1038/srep40674>
- 676 Cramer, J.M., Scarsdale, J.N., Walavalkar, N.M., Buchwald, W.A., Ginder, G.D., Williams, D.C., 2014.  
677 Probing the Dynamic Distribution of Bound States for Methylcytosine-binding Domains on  
678 DNA\* \*This work was supported, in whole or in part, by National Institutes of Health Grants  
679 R01 GM098624 (to D. C. W.) and R01 DK029902 (to G. D. G.). NMR data were acquired using  
680 NMR instrumentation in the Virginia Commonwealth University Massey Cancer Center  
681 Structural Biology Core, and surface plasmon resonance data were acquired in the Virginia  
682 Commonwealth University Massey Cancer Center Flow Cytometry Core, both of which are  
683 supported, in part, by NCI Cancer Center Core Support Grant P30 CA016059. *J. Biol. Chem.*  
684 289, 1294–1302. <https://doi.org/10.1074/jbc.M113.512236>
- 685 Denslow, S.A., Wade, P.A., 2007. The human Mi-2/NuRD complex and gene regulation. *Oncogene* 26,  
686 5433–5438. <https://doi.org/10.1038/sj.onc.1210611>
- 687 Desai, M.A., Webb, H.D., Sinanan, L.M., Scarsdale, J.N., Walavalkar, N.M., Ginder, G.D., Williams,  
688 D.C., 2015. An intrinsically disordered region of methyl-CpG binding domain protein 2 (MBD2)  
689 recruits the histone deacetylase core of the NuRD complex. *Nucleic Acids Res.* 43, 3100–3113.  
690 <https://doi.org/10.1093/nar/gkv168>
- 691 Farnung, L., Ochmann, M., Cramer, P., 2020. Nucleosome-CHD4 chromatin remodeler structure maps  
692 human disease mutations. *eLife* 9, e56178. <https://doi.org/10.7554/eLife.56178>
- 693 Forbes, S., Clements, J., Dawson, E., Bamford, S., Webb, T., Dogan, A., Flanagan, A., Teague, J.,  
694 Wooster, R., Futreal, P.A., Stratton, M.R., 2006. Cosmic 2005. *Br. J. Cancer* 94, 318–322.  
695 <https://doi.org/10.1038/sj.bjc.6602928>
- 696 Ganesan, S.J., Feyder, M.J., Chemmama, I.E., Fang, F., Rout, M.P., Chait, B.T., Shi, Y., Munson, M.,  
697 Sali, A., 2020. Integrative structure and function of the yeast exocyst complex. *Protein Sci. Publ.*  
698 *Protein Soc.* 29, 1486–1501. <https://doi.org/10.1002/pro.3863>
- 699 Gnanapragasam, M.N., Scarsdale, J.N., Amaya, M.L., Webb, H.D., Desai, M.A., Walavalkar, N.M.,  
700 Wang, S.Z., Zu Zhu, S., Ginder, G.D., Williams, D.C., 2011. p66 $\alpha$ -MBD2 coiled-coil interaction  
701 and recruitment of Mi-2 are critical for globin gene silencing by the MBD2–NuRD complex.  
702 *Proc. Natl. Acad. Sci.* 108, 7487–7492.
- 703 Guo, T., Luna, A., Rajapakse, V.N., Koh, C.C., Wu, Z., Liu, W., Sun, Y., Gao, H., Menden, M.P., Xu,  
704 C., Calzone, L., Martignetti, L., Auwerx, C., Buljan, M., Banaei-Esfahani, A., Ori, A., Iskar, M.,  
705 Gillet, L., Bi, R., Zhang, J., Zhang, H., Yu, C., Zhong, Q., Varma, S., Schmitt, U., Qiu, P., Zhang,  
706 Q., Zhu, Y., Wild, P.J., Garnett, M.J., Bork, P., Beck, M., Liu, K., Saez-Rodriguez, J., Elloumi,  
707 F., Reinhold, W.C., Sander, C., Pommier, Y., Aebersold, R., 2019. Quantitative Proteome  
708 Landscape of the NCI-60 Cancer Cell Lines. *iScience* 21, 664–680.  
709 <https://doi.org/10.1016/j.isci.2019.10.059>
- 710 Gutierrez, C., Chemmama, I.E., Mao, H., Yu, C., Echeverria, I., Block, S.A., Rychnovsky, S.D., Zheng,  
711 N., Sali, A., Huang, L., 2020. Structural dynamics of the human COP9 signalosome revealed by  
712 cross-linking mass spectrometry and integrative modeling. *Proc. Natl. Acad. Sci.* 117, 4088–  
713 4098. <https://doi.org/10.1073/pnas.1915542117>
- 714 Hoffmann, A., Spengler, D., 2019. Chromatin Remodeling Complex NuRD in Neurodevelopment and  
715 Neurodevelopmental Disorders. *Front. Genet.* 0. <https://doi.org/10.3389/fgene.2019.00682>

- 716 Hong, W., Nakazawa, M., Chen, Y.-Y., Kori, R., Vakoc, C.R., Rakowski, C., Blobel, G.A., 2005. FOG-  
717 1 recruits the NuRD repressor complex to mediate transcriptional repression by GATA-1. *EMBO*  
718 *J.* 24, 2367–2378. <https://doi.org/10.1038/sj.emboj.7600703>
- 719 Jumper, J., Evans, R., Pritzel, A., Green, T., Figurnov, M., Ronneberger, O., Tunyasuvunakool, K., Bates,  
720 R., Židek, A., Potapenko, A., Bridgland, A., Meyer, C., Kohl, S.A.A., Ballard, A.J., Cowie, A.,  
721 Romera-Paredes, B., Nikolov, S., Jain, R., Adler, J., Back, T., Petersen, S., Reiman, D., Clancy,  
722 E., Zielinski, M., Steinegger, M., Pacholska, M., Berghammer, T., Bodenstein, S., Silver, D.,  
723 Vinyals, O., Senior, A.W., Kavukcuoglu, K., Kohli, P., Hassabis, D., 2021. Highly accurate  
724 protein structure prediction with AlphaFold. *Nature* 596, 583–589.  
725 <https://doi.org/10.1038/s41586-021-03819-2>
- 726 Kim, S.J., Fernandez-Martinez, J., Nudelman, I., Shi, Y., Zhang, W., Raveh, B., Herricks, T., Slaughter,  
727 B.D., Hogan, J.A., Upla, P., Chemmama, I.E., Pellarin, R., Echeverria, I., Shivaraju, M.,  
728 Chaudhury, A.S., Wang, J., Williams, R., Unruh, J.R., Greenberg, C.H., Jacobs, E.Y., Yu, Z., de  
729 la Cruz, M.J., Mironska, R., Stokes, D.L., Aitchison, J.D., Jarrold, M.F., Gerton, J.L., Ludtke,  
730 S.J., Akey, C.W., Chait, B.T., Sali, A., Rout, M.P., 2018. Integrative structure and functional  
731 anatomy of a nuclear pore complex. *Nature* 555, 475–482. <https://doi.org/10.1038/nature26003>
- 732 Kloet, S.L., Baymaz, H.I., Makowski, M., Groenewold, V., Jansen, P.W.T.C., Berendsen, M., Niazi, H.,  
733 Kops, G.J., Vermeulen, M., 2015. Towards elucidating the stability, dynamics and architecture  
734 of the nucleosome remodeling and deacetylase complex by using quantitative interaction  
735 proteomics. *FEBS J.* 282, 1774–1785. <https://doi.org/10.1111/febs.12972>
- 736 Lejon, S., Thong, S.Y., Murthy, A., AlQarni, S., Murzina, N.V., Blobel, G.A., Laue, E.D., Mackay, J.P.,  
737 2011. Insights into Association of the NuRD Complex with FOG-1 from the Crystal Structure of  
738 an RbAp48-FOG-1 Complex \*. *J. Biol. Chem.* 286, 1196–1203.  
739 <https://doi.org/10.1074/jbc.M110.195842>
- 740 Li, D.-Q., Kumar, R., 2010. Mi-2/NuRD complex making inroads into DNA-damage response pathway.  
741 *Cell Cycle Georget. Tex* 9, 2071–2079. <https://doi.org/10.4161/cc.9.11.11735>
- 742 Low, J.K.K., Silva, A.P.G., Sharifi Tabar, M., Torrado, M., Webb, S.R., Parker, B.L., Sana, M., Smits,  
743 C., Schmidberger, J.W., Brillault, L., Jackman, M.J., Williams, D.C., Blobel, G.A., Hake, S.B.,  
744 Shepherd, N.E., Landsberg, M.J., Mackay, J.P., 2020. The Nucleosome Remodeling and  
745 Deacetylase Complex Has an Asymmetric, Dynamic, and Modular Architecture. *Cell Rep.* 33,  
746 108450. <https://doi.org/10.1016/j.celrep.2020.108450>
- 747 Millard, C.J., Fairall, L., Ragan, T.J., Savva, C.G., Schwabe, J.W.R., 2020. The topology of chromatin-  
748 binding domains in the NuRD deacetylase complex. *Nucleic Acids Res.* 48, 12972–12982.  
749 <https://doi.org/10.1093/nar/gkaa1121>
- 750 Millard, C.J., Varma, N., Saleh, A., Morris, K., Watson, P., Bottrill, A., Fairall, L., Smith, C., Schwabe,  
751 J., 2016. The structure of the core NuRD repression complex provides insights into its interaction  
752 with chromatin. *ELife* 2016. <https://doi.org/10.7554/eLife.13941>
- 753 Millard, C.J., Watson, P.J., Celardo, I., Gordiyenko, Y., Cowley, S.M., Robinson, C.V., Fairall, L.,  
754 Schwabe, J.W.R., 2013. Class I HDACs Share a Common Mechanism of Regulation by Inositol  
755 Phosphates. *Mol. Cell* 51, 57–67. <https://doi.org/10.1016/j.molcel.2013.05.020>
- 756 Pettersen, E.F., Goddard, T.D., Huang, C.C., Couch, G.S., Greenblatt, D.M., Meng, E.C., Ferrin, T.E.,  
757 2004. UCSF Chimera--a visualization system for exploratory research and analysis. *J. Comput.*  
758 *Chem.* 25, 1605–1612. <https://doi.org/10.1002/jcc.20084>
- 759 Pettersen, E.F., Goddard, T.D., Huang, C.C., Meng, E.C., Couch, G.S., Croll, T.I., Morris, J.H., Ferrin,  
760 T.E., 2021. UCSF ChimeraX: Structure visualization for researchers, educators, and developers.  
761 *Protein Sci.* 30, 70–82. <https://doi.org/10.1002/pro.3943>
- 762 Pflum, M.K.H., Tong, J.K., Lane, W.S., Schreiber, S.L., 2001. Histone Deacetylase 1 Phosphorylation  
763 Promotes Enzymatic Activity and Complex Formation\*. *J. Biol. Chem.* 276, 47733–47741.  
764 <https://doi.org/10.1074/jbc.M105590200>

- 765 Punjani, A., Rubinstein, J.L., Fleet, D.J., Brubaker, M.A., 2017. cryoSPARC: algorithms for rapid  
766 unsupervised cryo-EM structure determination. *Nat. Methods* 14, 290–296.  
767 <https://doi.org/10.1038/nmeth.4169>
- 768 Rathert, P., Dhayalan, A., Murakami, M., Zhang, X., Tamas, R., Jurkowska, R., Komatsu, Y., Shinkai,  
769 Y., Cheng, X., Jeltsch, A., 2008. Protein lysine methyltransferase G9a acts on non-histone targets.  
770 *Nat. Chem. Biol.* 4, 344–346. <https://doi.org/10.1038/nchembio.88>
- 771 Reynolds, N., O’Shaughnessy, A., Hendrich, B., 2013. Transcriptional repressors: multifaceted  
772 regulators of gene expression. *Development* 140, 505–512. <https://doi.org/10.1242/dev.083105>
- 773 Rieping, W., Habeck, M., Nilges, M., 2005. Inferential Structure Determination. *Science* 309, 303–306.  
774 <https://doi.org/10.1126/science.1110428>
- 775 Romero, P., Obradovic, Z., Kissinger, C., Villafranca, J.E., Dunker, A.K., 1997. Identifying disordered  
776 regions in proteins from amino acid sequence, in: *Proceedings of International Conference on*  
777 *Neural Networks (ICNN’97)*. Presented at the *Proceedings of International Conference on Neural*  
778 *Networks (ICNN’97)*, pp. 90–95 vol.1. <https://doi.org/10.1109/ICNN.1997.611643>
- 779 Romero, P., Obradovic, Z., Li, X., Garner, E.C., Brown, C.J., Dunker, A.K., 2001. Sequence complexity  
780 of disordered protein. *Proteins* 42, 38–48. [https://doi.org/10.1002/1097-0134\(20010101\)42:1<38::aid-prot50>3.0.co;2-3](https://doi.org/10.1002/1097-0134(20010101)42:1<38::aid-prot50>3.0.co;2-3)
- 782 Rout, M.P., Sali, A., 2019. Principles for Integrative Structural Biology Studies. *Cell* 177, 1384–1403.  
783 <https://doi.org/10.1016/j.cell.2019.05.016>
- 784 Russel, D., Lasker, K., Webb, B., Velázquez-Muriel, J., Tjioe, E., Schneidman-Duhovny, D., Peterson,  
785 B., Sali, A., 2012. Putting the Pieces Together: Integrative Modeling Platform Software for  
786 Structure Determination of Macromolecular Assemblies. *PLoS Biol.* 10, e1001244.  
787 <https://doi.org/10.1371/journal.pbio.1001244>
- 788 Saltzberg, D., Greenberg, C.H., Viswanath, S., Chemmama, I., Webb, B., Pellarin, R., Echeverria, I.,  
789 Sali, A., 2019. Modeling Biological Complexes Using Integrative Modeling Platform, in:  
790 Bonomi, M., Camilloni, C. (Eds.), *Biomolecular Simulations: Methods and Protocols*, *Methods*  
791 *in Molecular Biology*. Springer, New York, NY, pp. 353–377. [https://doi.org/10.1007/978-1-4939-9608-7\\_15](https://doi.org/10.1007/978-1-4939-9608-7_15)
- 793 Saltzberg, D.J., Viswanath, S., Echeverria, I., Chemmama, I.E., Webb, B., Sali, A., 2021. Using  
794 Integrative Modeling Platform to compute, validate, and archive a model of a protein complex  
795 structure. *Protein Sci.* 30, 250–261. <https://doi.org/10.1002/pro.3995>
- 796 Schneidman-Duhovny, D., Pellarin, R., Sali, A., 2014. Uncertainty in integrative structural modeling.  
797 *Curr. Opin. Struct. Biol.* 28, 96–104. <https://doi.org/10.1016/j.sbi.2014.08.001>
- 798 Sharifi Tabar, M., Mackay, J.P., Low, J.K.K., 2019. The stoichiometry and interactome of the  
799 Nucleosome Remodeling and Deacetylase (NuRD) complex are conserved across multiple cell  
800 lines. *FEBS J.* 286, 2043–2061. <https://doi.org/10.1111/febs.14800>
- 801 Shi, Y., Fernandez-Martinez, J., Tjioe, E., Pellarin, R., Kim, S.J., Williams, R., Schneidman-Duhovny,  
802 D., Sali, A., Rout, M.P., Chait, B.T., 2014. Structural characterization by cross-linking reveals  
803 the detailed architecture of a coatamer-related heptameric module from the nuclear pore complex.  
804 *Mol. Cell. Proteomics MCP* 13, 2927–2943. <https://doi.org/10.1074/mcp.M114.041673>
- 805 Smeenk, G., Wiegant, W.W., Vrolijk, H., Solari, A.P., Pastink, A., van Attikum, H., 2010. The NuRD  
806 chromatin-remodeling complex regulates signaling and repair of DNA damage. *J. Cell Biol.* 190,  
807 741–749. <https://doi.org/10.1083/jcb.201001048>
- 808 Smits, A.H., Jansen, P.W.T.C., Poser, I., Hyman, A.A., Vermeulen, M., 2013. Stoichiometry of  
809 chromatin-associated protein complexes revealed by label-free quantitative mass spectrometry-  
810 based proteomics. *Nucleic Acids Res.* 41, e28. <https://doi.org/10.1093/nar/gks941>
- 811 Söding, J., Biegert, A., Lupas, A.N., 2005. The HHpred interactive server for protein homology detection  
812 and structure prediction. *Nucleic Acids Res.* 33, W244–248. <https://doi.org/10.1093/nar/gki408>

- 813 Spruijt, C.G., Luijsterburg, M.S., Menafrá, R., Lindeboom, R.G.H., Jansen, P.W.T.C., Edupuganti, R.R.,  
814 Baltissen, M.P., Wiegant, W.W., Voelker-Albert, M.C., Matarese, F., Mensinga, A., Poser, I.,  
815 Vos, H.R., Stunnenberg, H.G., van Attikum, H., Vermeulen, M., 2016. ZMYND8 Co-localizes  
816 with NuRD on Target Genes and Regulates Poly(ADP-Ribose)-Dependent Recruitment of  
817 GATAD2A/NuRD to Sites of DNA Damage. *Cell Rep.* 17, 783–798.  
818 <https://doi.org/10.1016/j.celrep.2016.09.037>
- 819 Tjandra, N., Omichinski, J.G., Gronenborn, A.M., Clore, G.M., Bax, A., 1997. Use of dipolar <sup>1</sup>H-<sup>15</sup>N  
820 and <sup>1</sup>H-<sup>13</sup>C couplings in the structure determination of magnetically oriented macromolecules  
821 in solution. *Nat. Struct. Biol.* 4, 732–738. <https://doi.org/10.1038/nsb0997-732>
- 822 Toh, Y., Nicolson, G.L., 2009. The role of the MTA family and their encoded proteins in human cancers:  
823 molecular functions and clinical implications. *Clin. Exp. Metastasis* 26, 215–227.  
824 <https://doi.org/10.1007/s10585-008-9233-8>
- 825 Viswanath, S., Bonomi, M., Kim, S.J., Klenchin, V.A., Taylor, K.C., Yabut, K.C., Umbreit, N.T., Van  
826 Epps, H.A., Meehl, J., Jones, M.H., Russel, D., Velazquez-Muriel, J.A., Winey, M., Rayment, I.,  
827 Davis, T.N., Sali, A., Muller, E.G., 2017a. The molecular architecture of the yeast spindle pole  
828 body core determined by Bayesian integrative modeling. *Mol. Biol. Cell* 28, 3298–3314.  
829 <https://doi.org/10.1091/mbc.E17-06-0397>
- 830 Viswanath, S., Chemmama, I.E., Cimermancic, P., Sali, A., 2017b. Assessing Exhaustiveness of  
831 Stochastic Sampling for Integrative Modeling of Macromolecular Structures. *Biophys. J.* 113,  
832 2344–2353. <https://doi.org/10.1016/j.bpj.2017.10.005>
- 833 Ward, A.B., Sali, A., Wilson, I.A., 2013. Integrative Structural Biology. *Science* 339, 913–915.  
834 <https://doi.org/10.1126/science.1228565>
- 835 Webb, B., Viswanath, S., Bonomi, M., Pellarin, R., Greenberg, C.H., Saltzberg, D., Sali, A., 2018.  
836 Integrative structure modeling with the Integrative Modeling Platform. *Protein Sci.* 27, 245–258.  
837 <https://doi.org/10.1002/pro.3311>
- 838 Yoshida, T., Hazan, I., Zhang, J., Ng, S.Y., Naito, T., Snippert, H.J., Heller, E.J., Qi, X., Lawton, L.N.,  
839 Williams, C.J., Georgopoulos, K., 2008. The role of the chromatin remodeler Mi-2β in  
840 hematopoietic stem cell self-renewal and multilineage differentiation. *Genes Dev.* 22, 1174–  
841 1189. <https://doi.org/10.1101/gad.1642808>
- 842 Zhang, W., Aubert, A., Gomez de Segura, J.M., Karuppasamy, M., Basu, S., Murthy, A.S., Diamante,  
843 A., Drury, T.A., Balmer, J., Cramard, J., Watson, A.A., Lando, D., Lee, S.F., Palayret, M., Kloet,  
844 S.L., Smits, A.H., Deery, M.J., Vermeulen, M., Hendrich, B., Klenerman, D., Schaffitzel, C.,  
845 Berger, I., Laue, E.D., 2016. The Nucleosome Remodeling and Deacetylase Complex NuRD Is  
846 Built from Preformed Catalytically Active Sub-modules. *J. Mol. Biol.* 428, 2931–2942.  
847 <https://doi.org/10.1016/j.jmb.2016.04.025>
- 848 Zhang, Y., Ng, H.-H., Erdjument-Bromage, H., Tempst, P., Bird, A., Reinberg, D., 1999. Analysis of the  
849 NuRD subunits reveals a histone deacetylase core complex and a connection with DNA  
850 methylation. *Genes Dev.* 13, 1924–1935.
- 851
